# Supplementary material for: Regulatory effects of a novel cysteine protease inhibitor in Baylisascaris schroederi migratory larvae on mice immune cells
Source: PubMed Central journal article supplement (PMC8981815; doi:10.1186/s13071-022-05240-8), 2022-04-04

Relative Expression Values

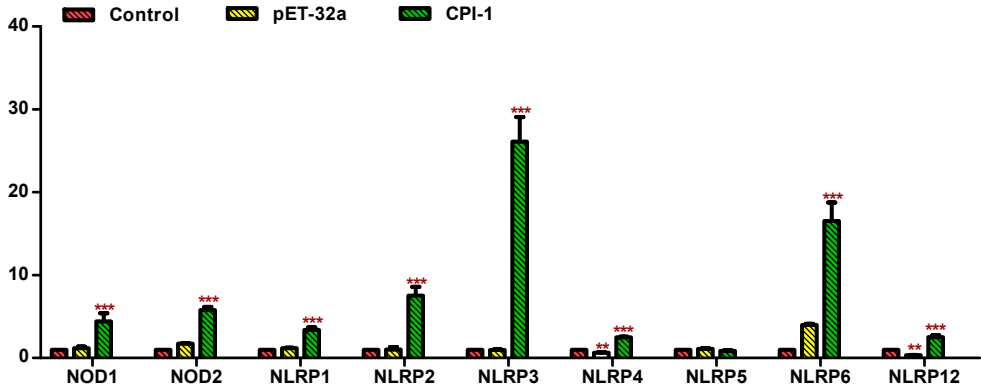

Supplement: 13071_2022_5240_MOESM2_ESM.pdf [file 13071_2022_5240_MOESM2_ESM.pdf]
